# Supplementary material for: Homopolymer tract organization in the human malarial parasite Plasmodium falciparum and related Apicomplexan parasites
Source: PubMed Central journal article supplement (PMC4194402; doi:10.1186/1471-2164-15-848), 2014-10-03
Supplement: 12864_2014_6522_MOESM1_ESM.pdf [file 12864_2014_6522_MOESM1_ESM.pdf]

## **Additional File 1**

### **Homopolymer tract organization in the human malarial parasite *Plasmodium falciparum* and related Apicomplexan parasites.**

Karen Russell<sup>1</sup>, Chia-Ho Cheng<sup>2,8</sup>, Jeffrey W. Bizzaro<sup>3</sup>, Nadia Ponts<sup>4</sup>, Richard D. Emes<sup>5,6</sup>, Karine Le Roch<sup>7</sup>,  
Kenneth A. Marx<sup>2</sup> and Paul Horrocks<sup>1,\*</sup>

<sup>1</sup>Institute for Science and Technology in Medicine, Keele University, Staffordshire ST5 5BG, United Kingdom; <sup>2</sup>Center for Intelligent Biomaterials, University of Massachusetts Lowell, MA 01854, USA; <sup>3</sup>Bioinformatics Organization Inc., Hudson, MA 01749, USA; <sup>4</sup>National Institute for Agricultural Research (INRA), UR1264-Mycolology and Food Safety (MycSA), CS20032, 33882 Villenave d'Ornon Cedex, France; <sup>5</sup>School of Veterinary Medicine and Science, University of Nottingham, Leicestershire LE12 5RD, United Kingdom. <sup>6</sup>Advanced Data Analysis Centre, University of Nottingham UK. <sup>7</sup>Dept. Cell Biology and Neuroscience, University of California, Riverside, CA 92521, USA. <sup>8</sup>Currently at Institute for Aging Research, Hebrew SeniorLife, Boston, MA 02131, USA

**Supplementary Figures S1 to S6**

**Supplementary Tables 1 and 2**

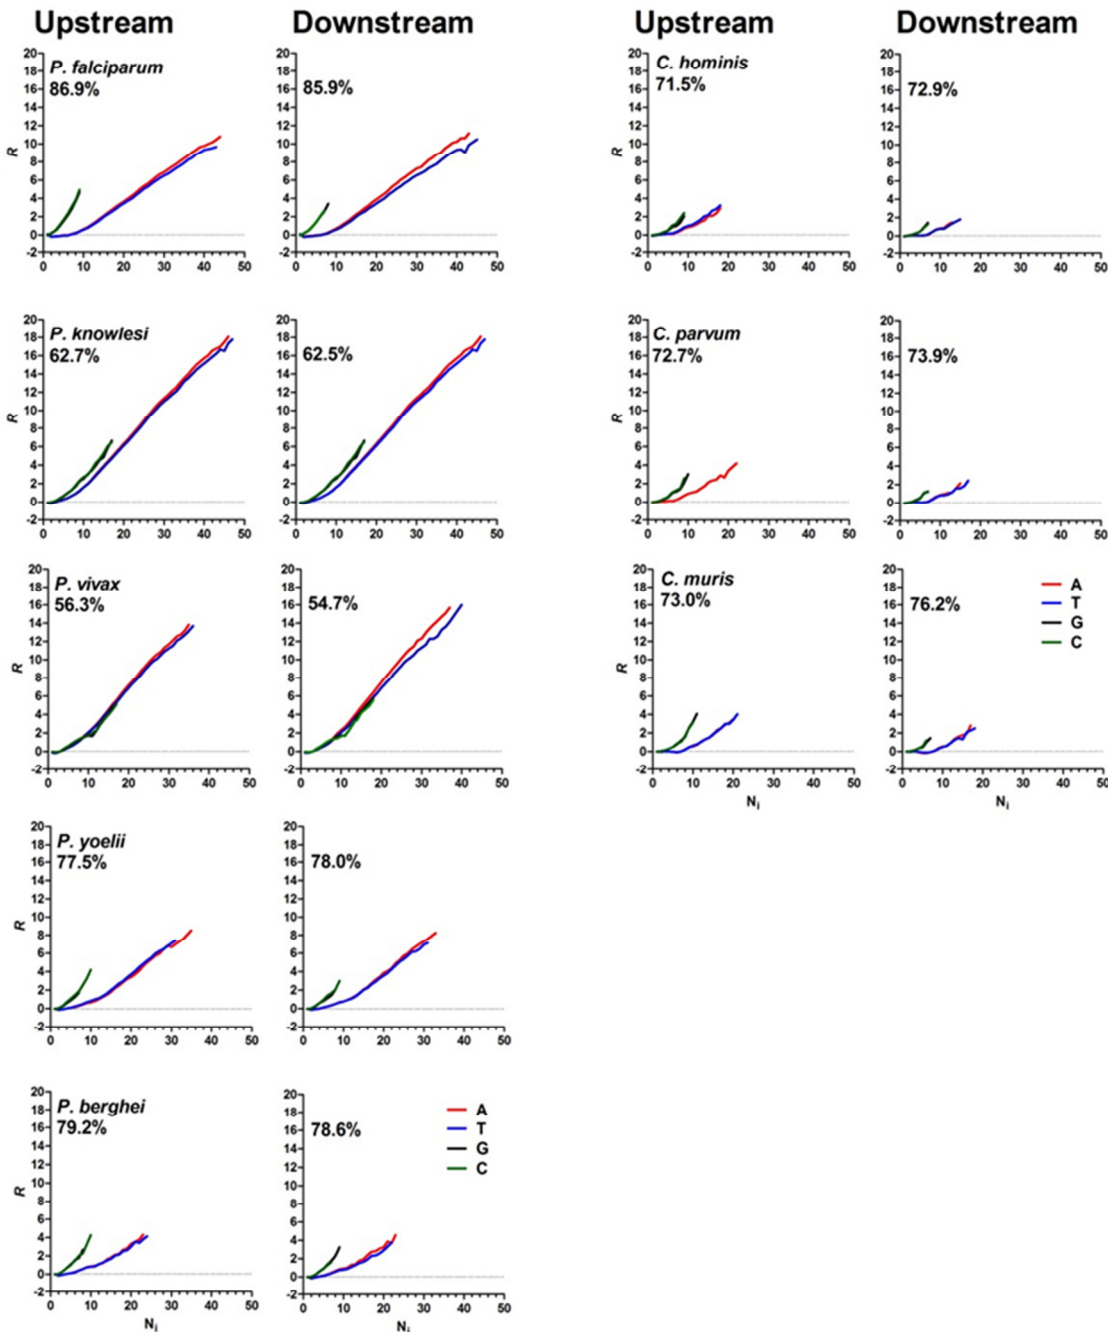

**Fig. S1. Representation of homopolymeric tracts in the proximal upstream and downstream intergenic flanking regions of *Plasmodium spp.* and *Cryptosporidium spp.* (above) These graphs plot  $R$  for homopolymer tracts (see key, lower right) as a function of their length ( $N_i$ ) for those organisms where short poly dG.dC and long poly dA.dT tracks are overrepresented. The %AT content of the proximal upstream and downstream intergenic sequences analysed is reported on each graph.**

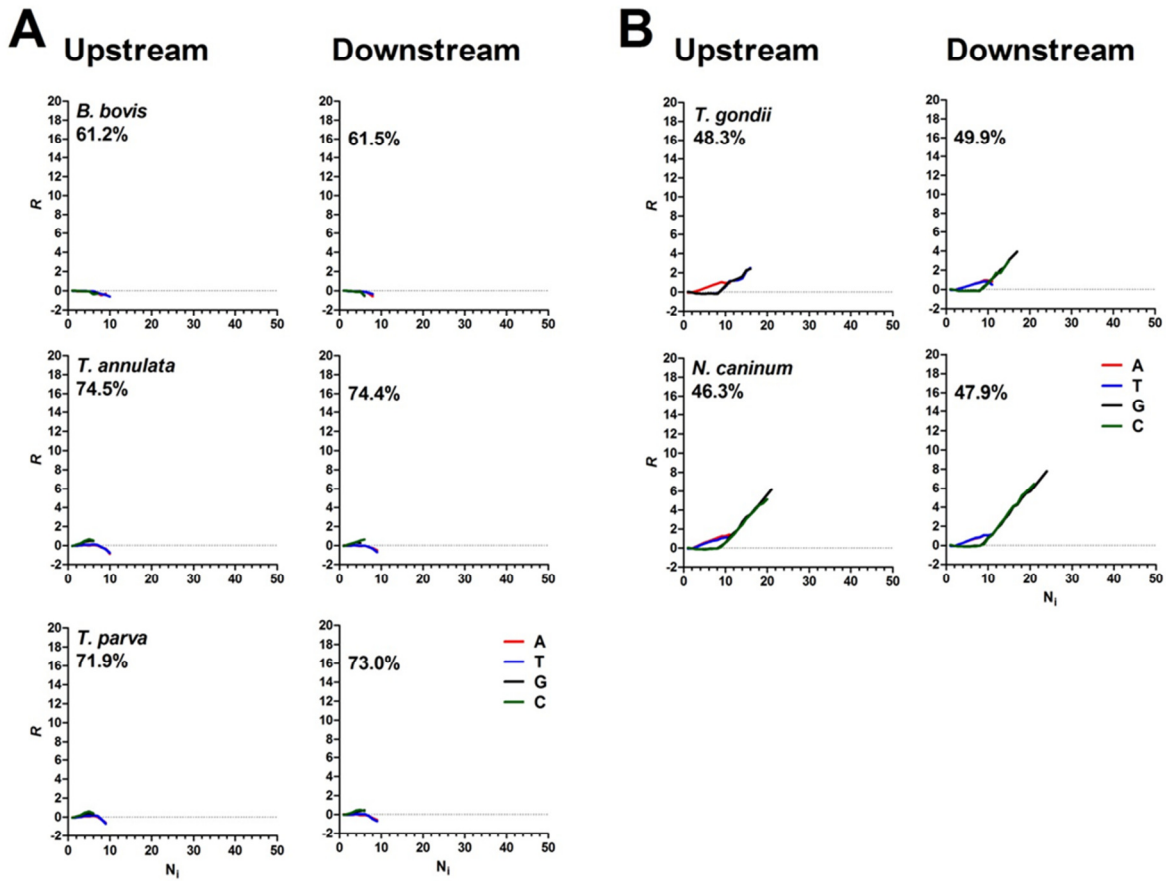

**Fig. S2. Representation of homopolymeric tracts in the proximal upstream and downstream intergenic flanking regions of the coccidian and piroplasmida organisms (above).** These graphs plot  $R$  for homopolymer tracts (see key, lower right) as a function of their length ( $N_i$ ) for those organisms where either (A) there was no evidence for overrepresentation of any homopolymeric tracts (*Theileria spp.* and *B. bovis*) or (B) long poly dG.dC and short poly dA.dT tracks are overrepresented. The %AT content of the proximal upstream and downstream intergenic sequences analysed is reported on each graph.

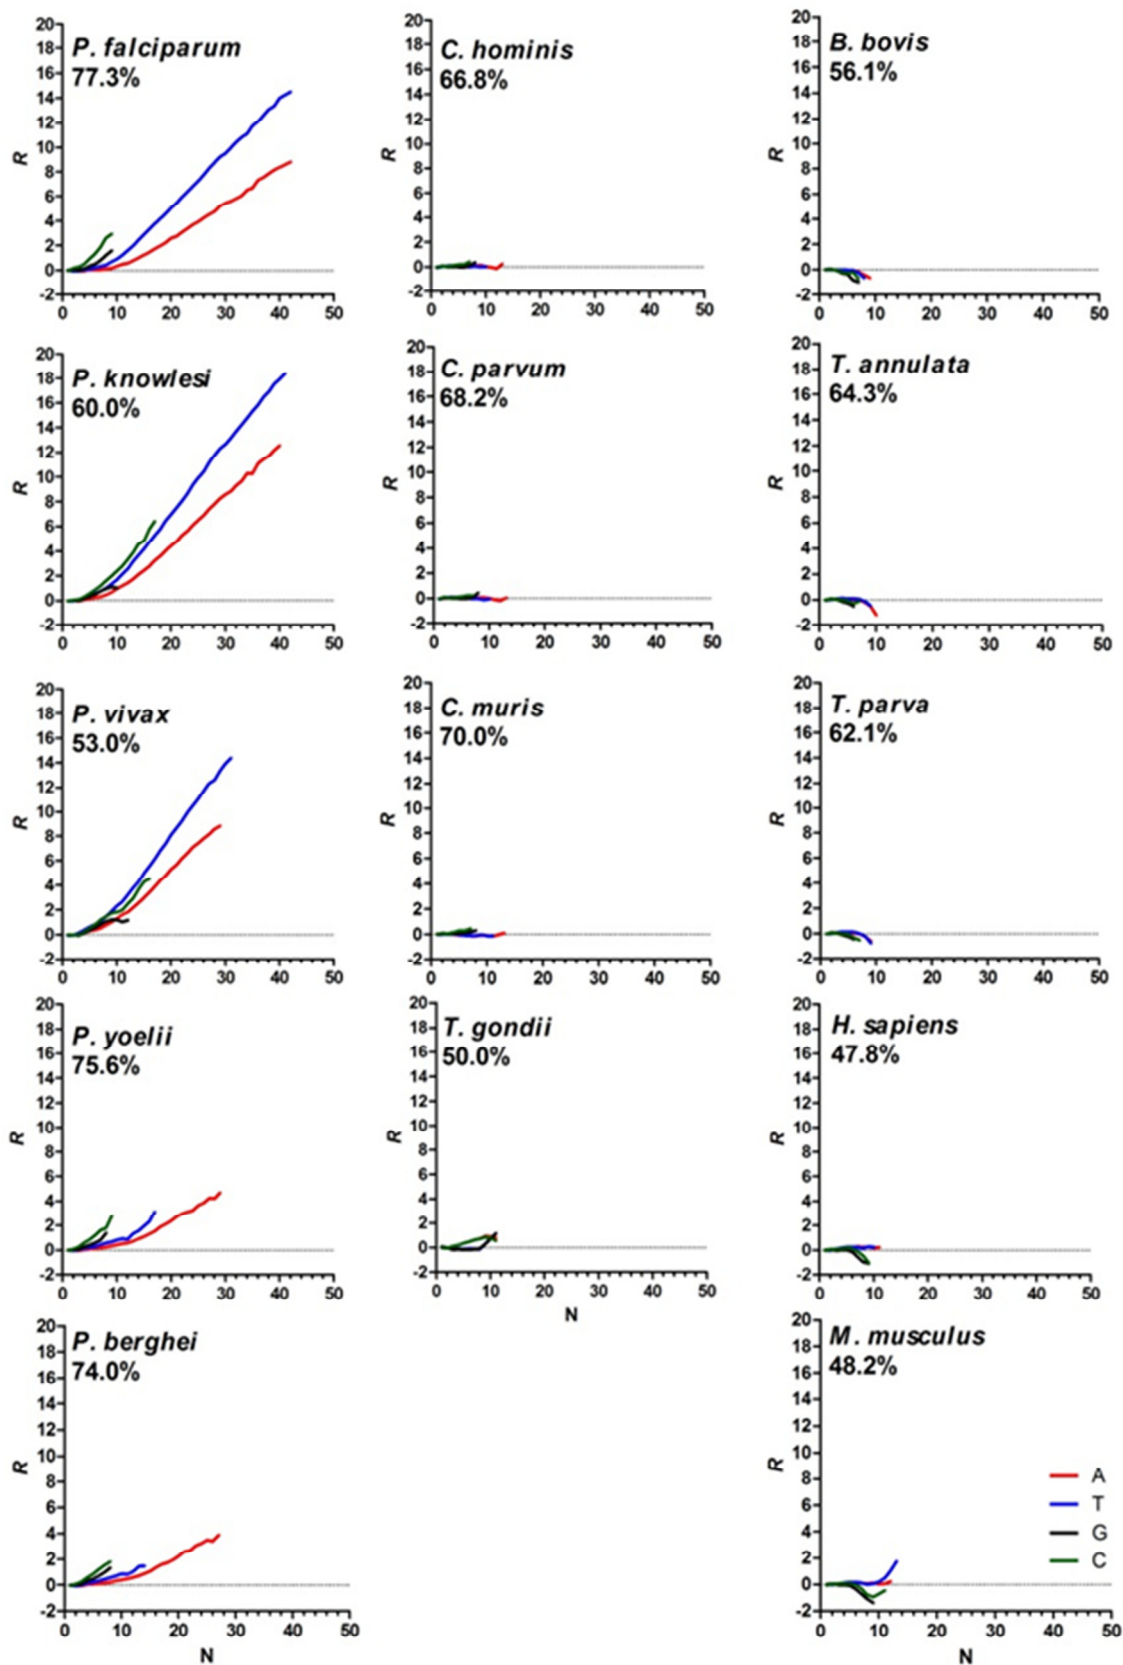

**Fig. S3. Representation of homopolymeric tracts over coding sequences (above).** These graphs plot  $R$  for homopolymer tracts (see key, lower right) as a function of their length ( $N_i$ ). The species as well as the average %AT content of the coding sequences analysed is reported on each graph.

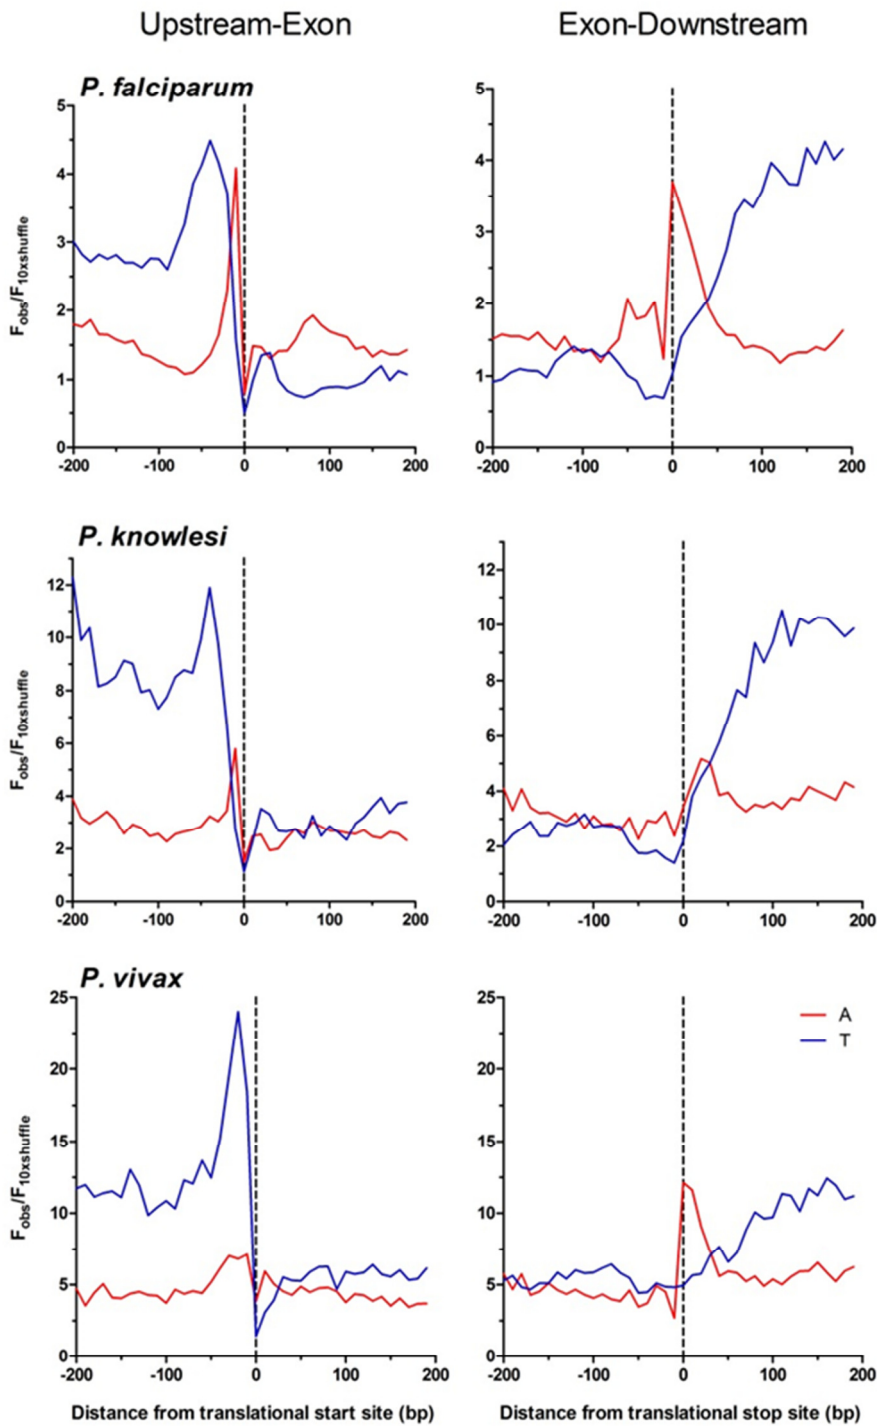

**Fig. S4. Relative spatial distribution of poly dA.dT tracts over translational start and stop sites of ORF from three *Plasmodium* spp. (above)** Plots are presented of the spatial distribution (bin size of 10 bases, x-axis) of relative frequency of poly dA (red line) and poly dT (blue line) tracts of 5 base length in the 200 bases of sense strand flanking either side of the translational start (upstream-exon) and stop (exon-downstream) sites. The Y-axis reports the relative frequency of observed ( $F_{obs}$ ) non-overlapping tracts divided by the frequency of the same tracts from a 10 x random shuffled average of the same sequences (i.e. same base composition retained in the 10X shuffle,  $F_{10xshuffle}$ ) to normalise  $F_{obs}$  across the diverse range

of nucleotide content in these *Plasmodium spp.* Note, compared to Fig. 7 the relative frequency of these peaks increases as the AT content decreases from *P. falciparum* to *P. knowlesi* and *P. vivax*.

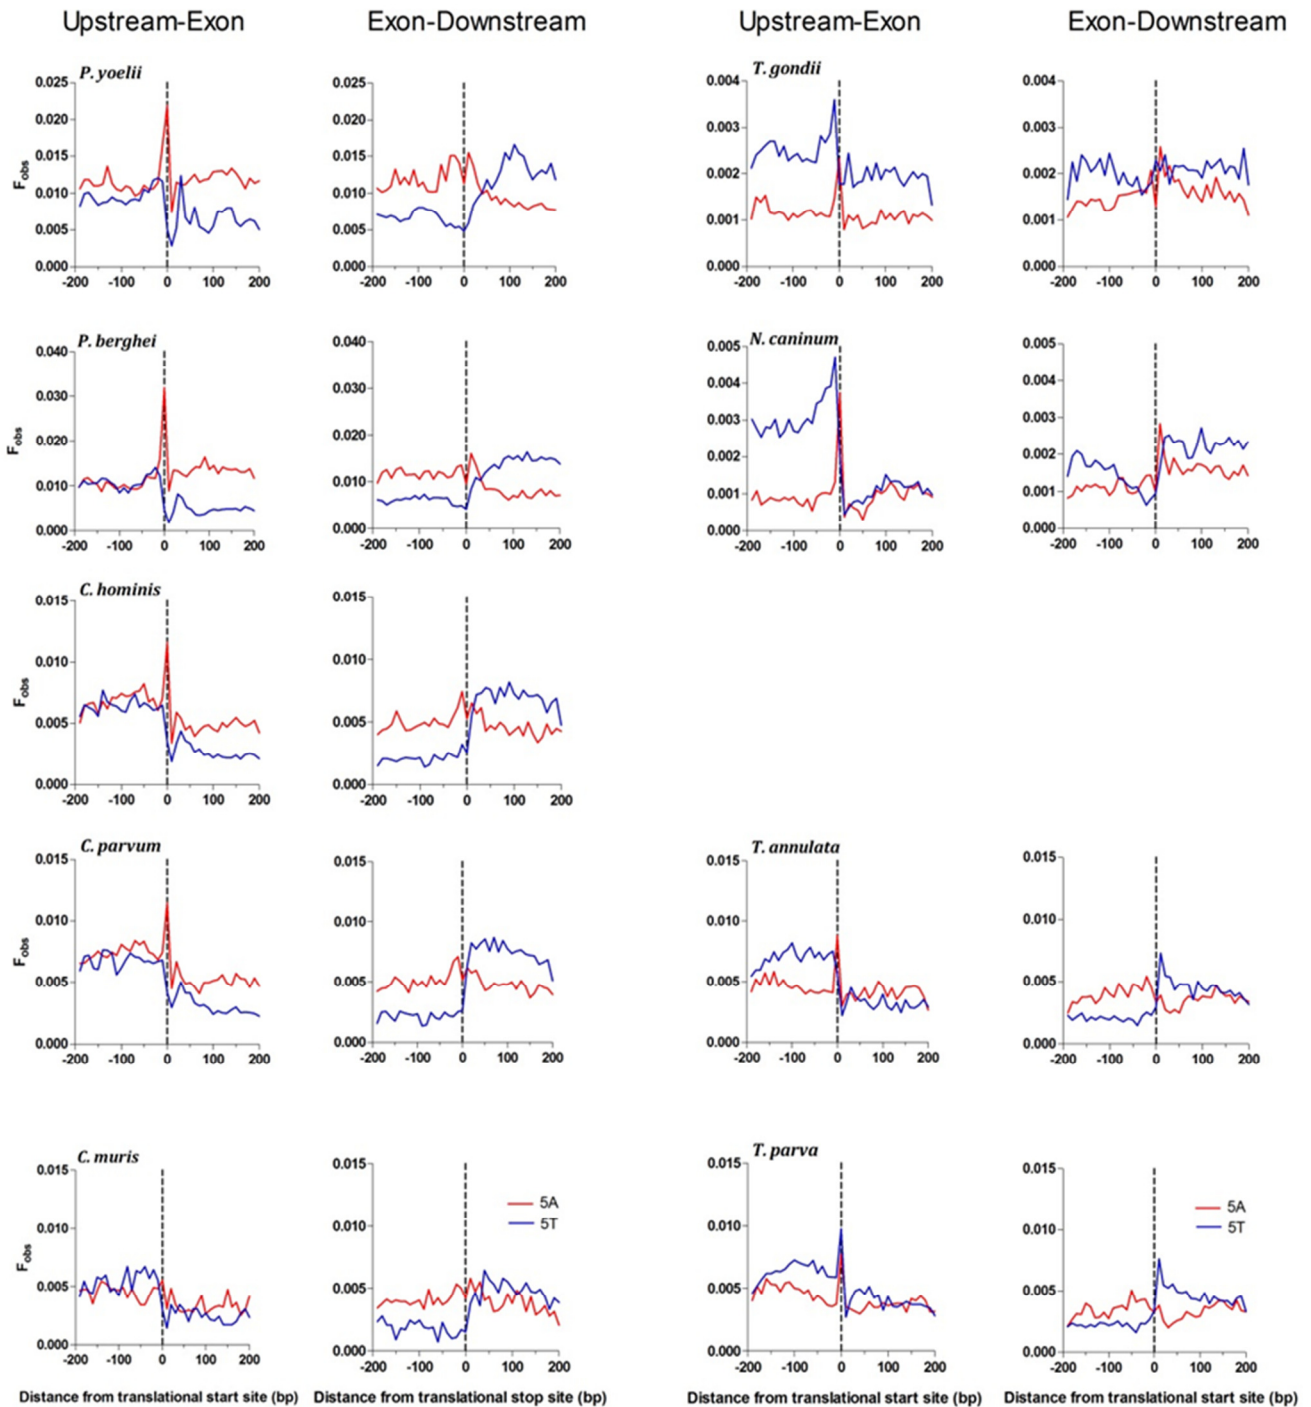

**Fig. S5 Enrichment of poly dA:dT tracts proximal to translational start and stop sites of ORF is a typical feature of intergenic flanking sequences in the organisms used in this study (above).** Plots of the spatial distribution (bin size of 10 bases, X-axis) of frequency ( $F_{obs}$ ) of poly dA (red line) and poly dT (blue line) tracts of 5 base length in the 200 bases of sense strand flanking either side of the translational start (upstream-exon) and stop (exon-downstream) sites.

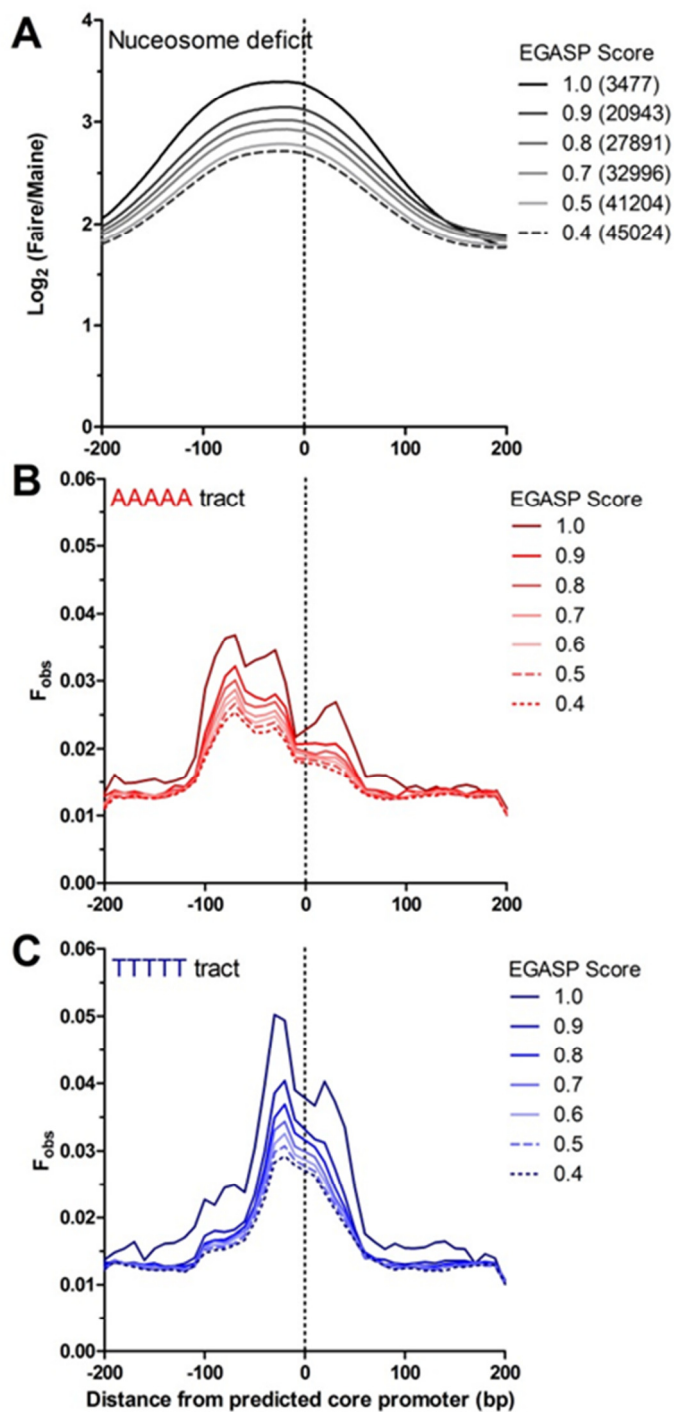

**Fig. S6. Spatial distribution of nucleosome occupancy and poly dA.dT tracts over *P. falciparum* predicted core promoters of varying confidence (above).** Prediction of core promoter regions as reported using the Malarial Promoter Predictor (MAPP) tool, derives scores that can be clustered based on their positive predictive value and sensitivity (using EGASP criteria, where 0.4 is moderately confident and 1 is highly confident). The 200 bases of sense strand sequence flanking either side of predicted core promoters for EGASP thresholds 0.4 to 1 were analysed to report (A) the relative nucleosome deficit over these core promoters ( $\log_2$  FAIRE/MAINE sequence reads), with the key reporting the number of core promoters analysed in each case in parentheses, and the  $F_{obs}$  of N=5 tract lengths of poly dA (B) and poly dT (C).

| Organism                       | Family            | % AT <sup>1</sup> | Gene Density <sup>2</sup> | Median size of IGR <sup>3</sup> (bp) |      |      | Ratio of IGR size <sup>4</sup> |     |     | Ups (bp) <sup>5</sup> | Down (bp) <sup>5</sup> |
|--------------------------------|-------------------|-------------------|---------------------------|--------------------------------------|------|------|--------------------------------|-----|-----|-----------------------|------------------------|
|                                |                   |                   |                           | A                                    | B    | C    | A                              | B   | C   |                       |                        |
| <i>Plasmodium falciparum</i>   | Plasmodiidae      | 80.6              | 4.3                       | 1938                                 | 1385 | 677  | 2.9                            | 2.0 | 1.0 | 2000                  | 700                    |
| <i>Plasmodium knowlesi</i>     | Plasmodiidae      | 62.5              | 4.6                       | 2162                                 | 1592 | 736  | 2.9                            | 2.2 | 1.0 | 2000                  | 700                    |
| <i>Plasmodium vivax</i>        | Plasmodiidae      | 57.7              | 4.5                       | 1956                                 | 1434 | 643  | 3.0                            | 2.2 | 1.0 | 2000                  | 700                    |
| <i>Plasmodium yoelli</i>       | Plasmodiidae      | 77.4              | 2.6                       | 1192                                 | 578  | 582  | 2.0                            | 1.0 | 1.0 | 1000                  | 700                    |
| <i>Plasmodium berghei</i>      | Plasmodiidae      | 79.2              | 3.1                       | na                                   | na   | na   | na                             | na  | na  | 1000                  | 700                    |
| <i>Cryptosporidium hominis</i> | Cryptosporidiidae | 68.3              | 2.3                       | 640                                  | 494  | 203  | 3.2                            | 2.4 | 1.0 | 650                   | 200                    |
| <i>Cryptosporidium parvum</i>  | Cryptosporidiidae | 70.0              | 2.4                       | 634                                  | 460  | 175  | 3.6                            | 2.6 | 1.0 | 650                   | 200                    |
| <i>Cryptosporidium muris</i>   | Cryptosporidiidae | 83.0              | na                        | na                                   | na   | na   | na                             | na  | na  | 650                   | 200                    |
| <i>Toxoplasma gondii</i>       | Sarcocystidae     | 47.7              | 9.1                       | 2576                                 | 2437 | 1623 | 1.6                            | 1.5 | 1.0 | 2500                  | 1600                   |
| <i>Neospora caninum</i>        | Sarcocystidae     | 45.2              | 8.6                       | 3603                                 | 3899 | 2172 | 1.7                            | 1.8 | 1.0 | 2500                  | 1600                   |
| <i>Babesia bovis</i>           | Babesiidae        | 58.2              | 2.2                       | 543                                  | 352  | 175  | 3.1                            | 2.0 | 1.0 | 550                   | 200                    |
| <i>Theileria annulata</i>      | Theileriidae      | 67.5              | 2.2                       | 439                                  | 277  | 125  | 3.5                            | 2.2 | 1.0 | 450                   | 150                    |
| <i>Theileria parva</i>         | Theileriidae      | 65.9              | 2.1                       | 376                                  | 256  | 154  | 2.4                            | 1.7 | 1.0 | 450                   | 150                    |

<sup>1</sup>%AT content of whole genome. <sup>2</sup>As total genome/ number of genes in kbp. <sup>3</sup>InterGenic Region. <sup>4</sup>Where size of IGR C is defined at 1. <sup>5</sup>Length of proximal upstream (Ups) and downstream (Down) sequence investigated here.

**Table S1**



| Organism             | Fraction <sub>i</sub> |      |      |      | base | Maximum length observed |    |    |    | Maximum length expected |    |    |      | Proportionment (P) |      |      |    | Threshold (R > 0.5) |    |    |      | Slope <sub>R</sub> <sup>1</sup> |      |       |   |
|----------------------|-----------------------|------|------|------|------|-------------------------|----|----|----|-------------------------|----|----|------|--------------------|------|------|----|---------------------|----|----|------|---------------------------------|------|-------|---|
|                      | frequency             |      |      |      |      | N <sub>max,obs</sub>    |    |    |    | M <sub>max,exp</sub>    |    |    |      |                    |      |      |    |                     |    |    |      |                                 |      |       |   |
|                      | A                     | C    | G    | T    |      | A                       | C  | G  | T  | A                       | C  | G  | T    | A                  | C    | G    | T  | A                   | C  | G  | T    | A                               | C    | G     | T |
| <i>P. falciparum</i> | 0.45                  | 0.09 | 0.13 | 0.32 | 42   | 9                       | 9  | 42 | 20 | 6                       | 8  | 14 | 2.10 | 1.50               | 1.13 | 3.00 | 12 | 4                   | 6  | 9  | 0.28 | 0.50                            | 0.36 | 0.44  |   |
| <i>P. knowlesi</i>   | 0.35                  | 0.18 | 0.22 | 0.25 | 40   | 17                      | 10 | 42 | 15 | 9                       | 10 | 11 | 2.67 | 1.89               | 1.00 | 3.82 | 9  | 5                   | 6  | 6  | 0.40 | 0.48                            | 0.21 | 0.54  |   |
| <i>P. vivax</i>      | 0.31                  | 0.22 | 0.25 | 0.22 | 29   | 16                      | 12 | 32 | 13 | 10                      | 11 | 10 | 2.23 | 1.60               | 1.09 | 3.20 | 7  | 5                   | 6  | 5  | 0.40 | 0.36                            | 0.23 | 0.56  |   |
| <i>P. yoelii</i>     | 0.44                  | 0.10 | 0.14 | 0.32 | 29   | 7                       | 8  | 17 | 19 | 6                       | 7  | 13 | 1.53 | 1.17               | 1.14 | 1.31 | 11 | 4                   | 6  | 8  | 0.24 | 0.39                            | 0.37 | 0.26  |   |
| <i>P. berghei</i>    | 0.45                  | 0.10 | 0.14 | 0.31 | 24   | 7                       | 9  | 22 | 19 | 7                       | 7  | 13 | 1.26 | 1.00               | 1.29 | 1.69 | 12 | 4                   | 4  | 8  | 0.22 | 0.30                            | 0.32 | 0.15  |   |
| <i>C. hominis</i>    | 0.36                  | 0.15 | 0.18 | 0.31 | 13   | 7                       | 8  | 10 | 14 | 8                       | 8  | 12 | 0.93 | 0.88               | 1.00 | 0.83 | na | na                  | na | na | na   | na                              | na   | na    |   |
| <i>C. parvum</i>     | 0.37                  | 0.14 | 0.17 | 0.31 | 13   | 9                       | 8  | 10 | 15 | 8                       | 8  | 13 | 0.87 | 1.13               | 1.00 | 0.77 | na | na                  | na | na | na   | na                              | na   | na    |   |
| <i>C. muris</i>      | 0.37                  | 0.14 | 0.16 | 0.33 | 13   | 7                       | 8  | 11 | 16 | 7                       | 8  | 14 | 0.81 | 1.00               | 1.00 | 0.79 | na | na                  | na | na | na   | na                              | na   | na    |   |
| <i>T. gondii</i>     | 0.25                  | 0.25 | 0.25 | 0.25 | 11   | 15                      | 15 | 12 | 11 | 11                      | 11 | 11 | 1.00 | 1.36               | 1.36 | 1.09 | 7  | 10                  | 10 | 7  | 0.05 | 0.41                            | 0.43 | <0.01 |   |
| <i>B. bovis</i>      | 0.29                  | 0.21 | 0.23 | 0.27 | 8    | 6                       | 6  | 8  | 12 | 9                       | 10 | 11 | 0.67 | 0.67               | 0.60 | 0.73 | na | na                  | na | na | na   | na                              | na   | na    |   |
| <i>T. annulata</i>   | 0.35                  | 0.17 | 0.19 | 0.29 | 9    | 6                       | 5  | 9  | 14 | 8                       | 9  | 12 | 0.64 | 0.75               | 0.56 | 0.75 | na | na                  | na | na | na   | na                              | na   | na    |   |
| <i>T. parva</i>      | 0.34                  | 0.18 | 0.20 | 0.28 | 9    | 6                       | 6  | 9  | 14 | 9                       | 9  | 12 | 0.64 | 0.67               | 0.67 | 0.75 | na | na                  | na | na | na   | na                              | na   | na    |   |
| <i>H. sapiens</i>    | 0.26                  | 0.26 | 0.26 | 0.22 | 11   | 9                       | 9  | 10 | 12 | 12                      | 13 | 11 | 0.92 | 0.75               | 0.69 | 0.91 | na | na                  | na | na | na   | na                              | na   | na    |   |
| <i>M. musculus</i>   | 0.26                  | 0.26 | 0.26 | 0.22 | 12   | 11                      | 9  | 13 | 13 | 13                      | 13 | 11 | 0.92 | 0.85               | 0.69 | 1.18 | na | na                  | na | 12 | na   | na                              | na   | 0.73  |   |

<sup>1</sup>slope of R between threshold of overrepresentation and N<sub>max,obs</sub>. <sup>2</sup>na, not available

Table S2
